# Supplementary material for: Can late stage marine mortality explain observed shifts in age structure of Chinook salmon?
Source: PLoS One. 2021 Feb 19;16(2):e0247370. doi: 10.1371/journal.pone.0247370 (PMC7895375; doi:10.1371/journal.pone.0247370)
Supplement: S1 File — (CSV) [file pone.0247370.s001.csv]

Year	River	Age	Ocean Age	Prop	Total Returns
2016	Salcha	3	1	0	2675
2016	Salcha	4	2	0.424	2675
2016	Salcha	5	3	0.407	2675
2016	Salcha	6	4	0.167	2675
2016	Salcha	7	5	0.002	2675
2015	Salcha	3	1	0.006	6879
2015	Salcha	4	2	0.229	6879
2015	Salcha	5	3	0.355	6879
2015	Salcha	6	4	0.409	6879
2015	Salcha	7	5	0	6879
2014	Salcha	3	1	0.015
2014	Salcha	4	2	0.146
2014	Salcha	5	3	0.598
2014	Salcha	6	4	0.226
2014	Salcha	7	5	0.015
2013	Salcha	3	1	0.011	5465
2013	Salcha	4	2	0.112	5465
2013	Salcha	5	3	0.156	5465
2013	Salcha	6	4	0.693	5465
2013	Salcha	7	5	0.028	5465
2012	Salcha	3	1	0.002	7165
2012	Salcha	4	2	0.06	7165
2012	Salcha	5	3	0.329	7165
2012	Salcha	6	4	0.593	7165
2012	Salcha	7	5	0.017	7165
2011	Salcha	2	0	0	7200
2011	Salcha	3	1	0.002	7200
2011	Salcha	4	2	0.146	7200
2011	Salcha	5	3	0.355	7200
2011	Salcha	6	4	0.482	7200
2011	Salcha	7	5	0.015	7200
2011	Salcha	8	6	0	7200
2010	Salcha	2	0	0	6135
2010	Salcha	3	1	0.005	6135
2010	Salcha	4	2	0.317	6135
2010	Salcha	5	3	0.533	6135
2010	Salcha	6	4	0.134	6135
2010	Salcha	7	5	0.012	6135
2010	Salcha	8	6	0	6135
2009	Salcha	3	1	0	12774
2009	Salcha	4	2	0.317	12774
2009	Salcha	5	3	0.214	12774
2009	Salcha	6	4	0.467	12774
2009	Salcha	7	5	0.002	12774
2009	Salcha	8	6	0	12774
2008	Salcha	3	1	0.007	5415
2008	Salcha	4	2	0.099	5415
2008	Salcha	5	3	0.518	5415
2008	Salcha	6	4	0.36	5415
2008	Salcha	7	5	0.017	5415
2008	Salcha	8	6	0	5415
2007	Salcha	3	1	0	6425
2007	Salcha	4	2	0.224	6425
2007	Salcha	5	3	0.269	6425
2007	Salcha	6	4	0.503	6425
2007	Salcha	7	5	0.003	6425
2006	Salcha	3	1	0	10679
2006	Salcha	4	2	0.057	10679
2006	Salcha	5	3	0.493	10679
2006	Salcha	6	4	0.43	10679
2006	Salcha	7	5	0.02	10679
2006	Salcha	8	6	0	10679
